# Supplementary material for: Self-adaptive spatial image denoising model based on scale correlation and SURE-LET in the nonsubsampled contourlet transform domain
Source: Springer Nature journal article supplement (doi:10.1007/s11432-013-4943-1), 2014-06-27
Supplement: 11432_2013_4943_MOESM1_ESM.pdf [file 11432_2013_4943_MOESM1_ESM.pdf]

中文题目：基于尺度相关性和 SURE-LET 的非下采样轮廓波变换域自适应空间图像去噪模型

关键词：空间图像，图像去噪，非下采样轮廓波变换，SURE-LET，尺度相关性

创新点：（1）基于非下采样轮廓波数学变换，提取不同频率尺度的特征信息，建立空间图像的跨尺度特征描述；（2）提出了一种新的局部自适应阈值策略，对不同尺度不同子带方向的变换系数进行判定，并由此构建了基于局部自适应阈值的跨尺度相关性计算方法，进一步提升了细节信息和噪声的区分能力；（3）通过求解基元阈值函数的最优化线性组合，实现了跨尺度自适应去噪，更有效地保持了空间图像的边缘细节信息。
